# Supplementary material
Source: Springer Nature journal article supplement (https://www.springermedizin.de/resource/supplementary/12889_2007_1175_MOESM9_ESM.pdf/9502618)
Supplement: MOESM9 [file 9502618]

Jina kamili la mama: \_\_\_\_\_  
 Wdaya: \_\_\_\_\_  
 Kata: \_\_\_\_\_  
 Kijiji: \_\_\_\_\_  
 Babazi/Mwenyekiti wa mtaa: \_\_\_\_\_  
 Namba ya kadi ya kliniki: \_\_\_\_\_  
 Jina la kliniki: \_\_\_\_\_  
 Mthamishi aliyoidhinisha: \_\_\_\_\_  
 Tarehe: \_\_\_\_\_

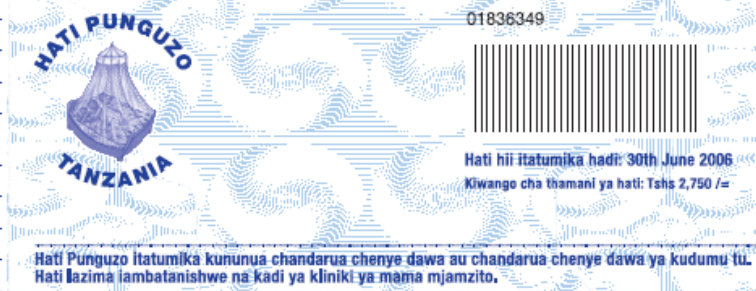

01836349

From the woman's perspective:

- All pregnant women of all gravidities attending ANC at any health facility in the country are eligible to receive a Hati Punguzo voucher; the receipt is marked on the woman's ANC card. She takes the voucher, together with her ANC card, to the shop where she can top up the value of the voucher with cash to purchase the size and shape of net of her choice. She is eligible to receive a voucher for each new pregnancy.

From the facility perspective:

- The facility receives a stock of books of 25 vouchers. On issue of a voucher, the woman's details (name, address) are recorded on the voucher stub and retained in the book; voucher receipt is also recorded in the ANC register. The health worker provides information to the woman about malaria in pregnancy and how to use her voucher to purchase a net. Voucher stubs are returned to the district and then to the logistics contractor

From the retailer perspective:

- Redeemed vouchers are taken to a net wholesaler, who exchanges the vouchers against ITN stock of equivalent value
